# Supplementary material for: Perivascular niche cells sense thrombocytopenia and activate hematopoietic stem cells in an IL-1 dependent manner
Source: PubMed Central journal article supplement (PMC10539537; doi:10.1038/s41467-023-41691-y), 2023-09-28
Supplement: 41467_2023_41691_MOESM1_ESM.pdf [file 41467_2023_41691_MOESM1_ESM.pdf]

# Supplementary Figure 1

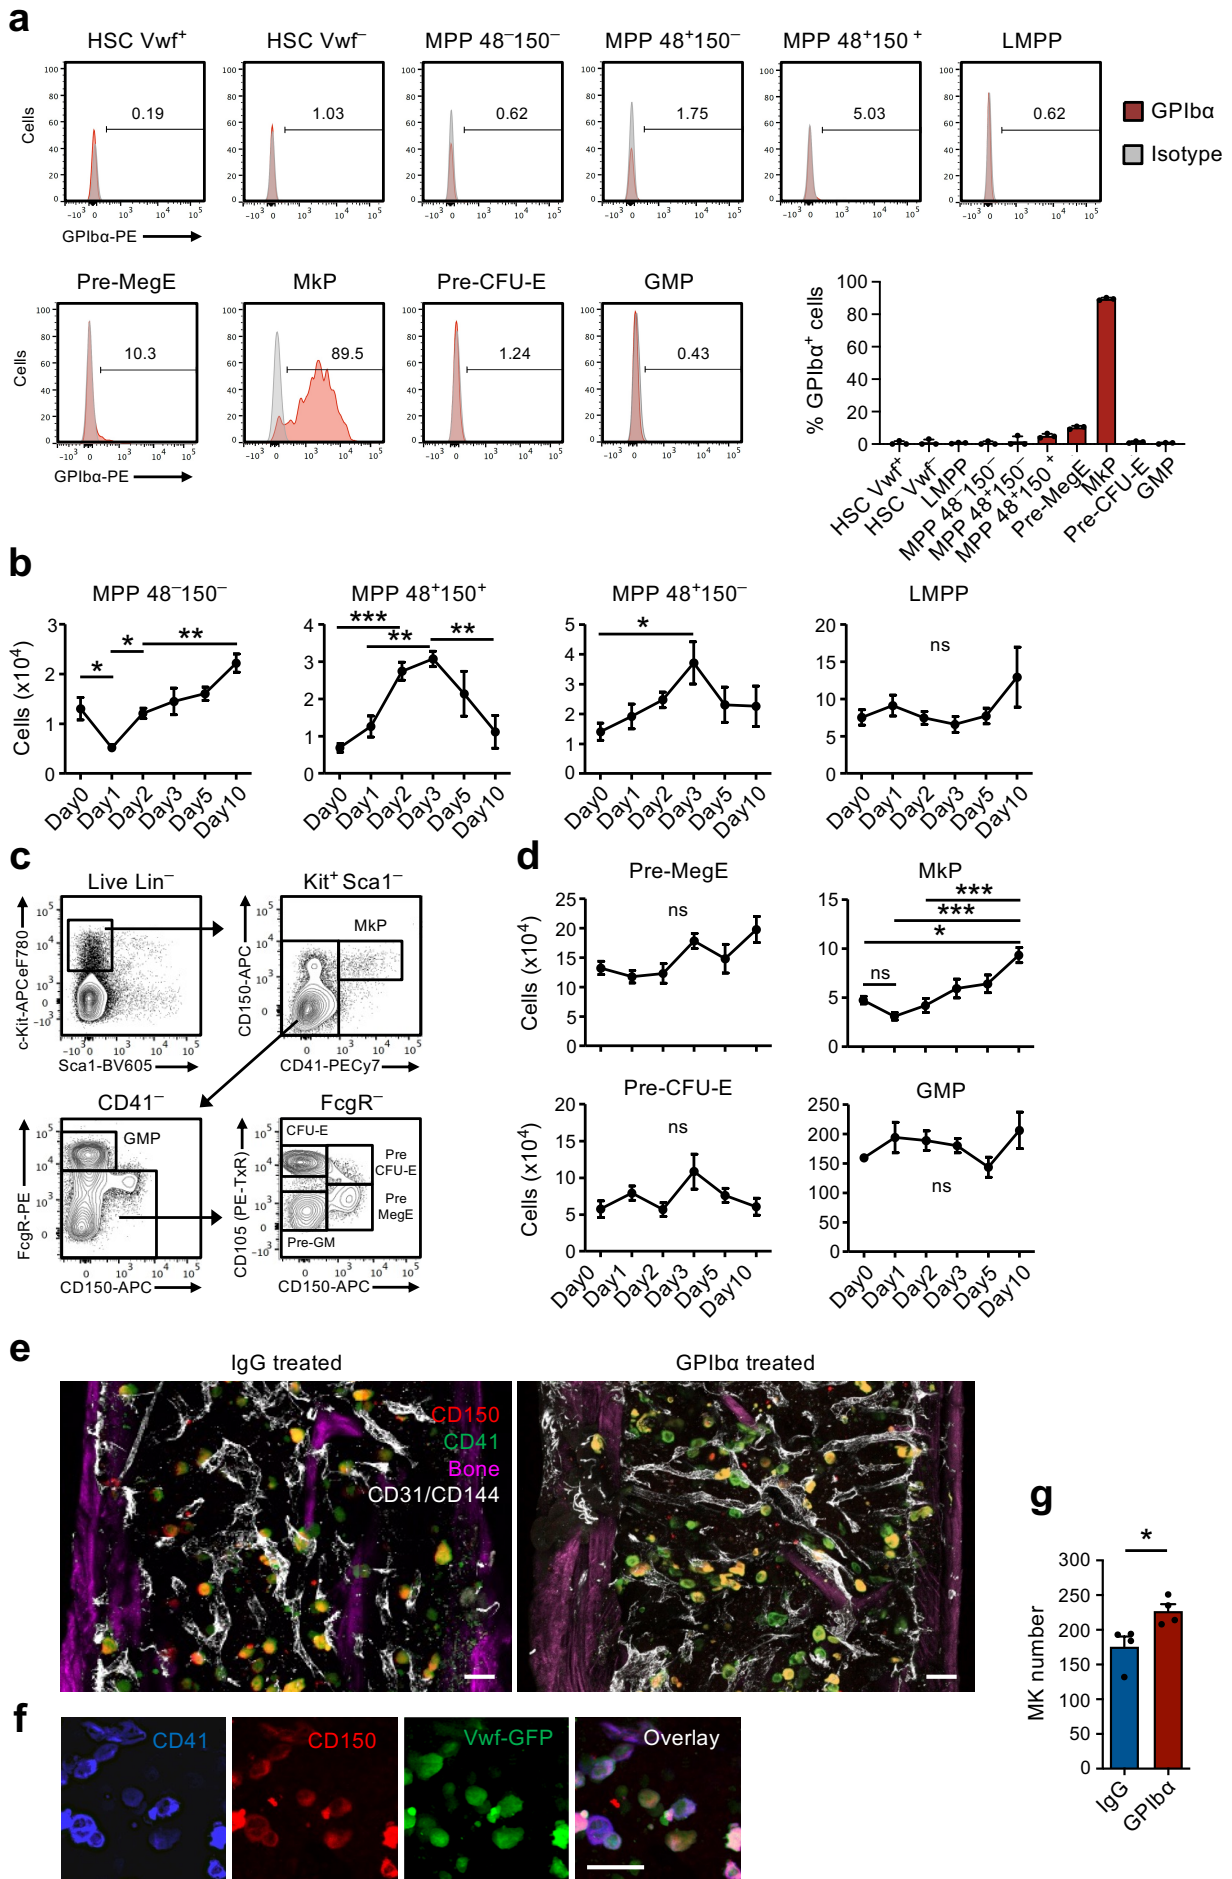

**Supplementary Figure 1. Kinetics of hematopoietic stem and progenitor cells after acute platelet depletion.** (Related to main Figure 1)

**(a)** FACS analysis of GPIIb $\alpha$ /CD42b expression on Vwf<sup>+</sup> and Vwf<sup>-</sup> HSCs, multipotent progenitors and myeloid progenitors. Data shows representative histograms (numbers indicate the average frequency of mice analyzed) and mean  $\pm$ SD values of 3 mice analyzed in 1 experiment representative of 3 independent experiments.

**(b-d)** Numbers of multipotent progenitors **(b)** and myeloid progenitors **(c-d)** at the indicated time points post platelet depletion with GPIIb $\alpha$  antibody. **(c)** Representative FACS profiles and gating strategy of myeloid progenitors. Data represent mean  $\pm$ SEM of 8 (Day0), 8 (Day1), 7 (Day2), 5 (Day3), 6 (Day5) and 5 (Day10) mice from 9 independent experiments **(b)**, and 3 (Day0), 5 (Day1), 7 (Day2), 5 (Day3), 6 (Day5) and 5 (Day10) from 6 independent experiments **(c-d)**.

**(e-g)** Quantification of Mk numbers in bone marrow by whole mount imaging of sternum. **(e)** Detail of sternum segments isolated from mice 1 day post IgG or GPIIb $\alpha$  antibody administration. CD41<sup>+</sup>CD150<sup>+</sup> Mk localization in relation to CD31<sup>+</sup>/CD144<sup>+</sup> endothelial cells and bone detected by second-harmonic generation signal. For quantification Mks were defined as CD41<sup>+</sup>CD150<sup>+</sup>Vwf-GFP<sup>+</sup> cells >20 $\mu$ m in diameter **(f)**. **(e-f)** Scale bars represent 70 $\mu$ m. **(g)** Number of Mks per sternum segment. Data represent mean  $\pm$ SD of 2 sternum segments isolated from each of 2 mice per condition and analyzed in 2 independent experiments. \*\*\*,  $p < 0.001$ ; \*\*,  $p < 0.01$ ; \* $p < 0.05$ ; ns, non-significant ( $p > 0.05$ ), **(b-d)**, 1-way ANOVA with Tukey's multiple comparisons; **g**, two-sided t-test).

# Supplementary Figure 2

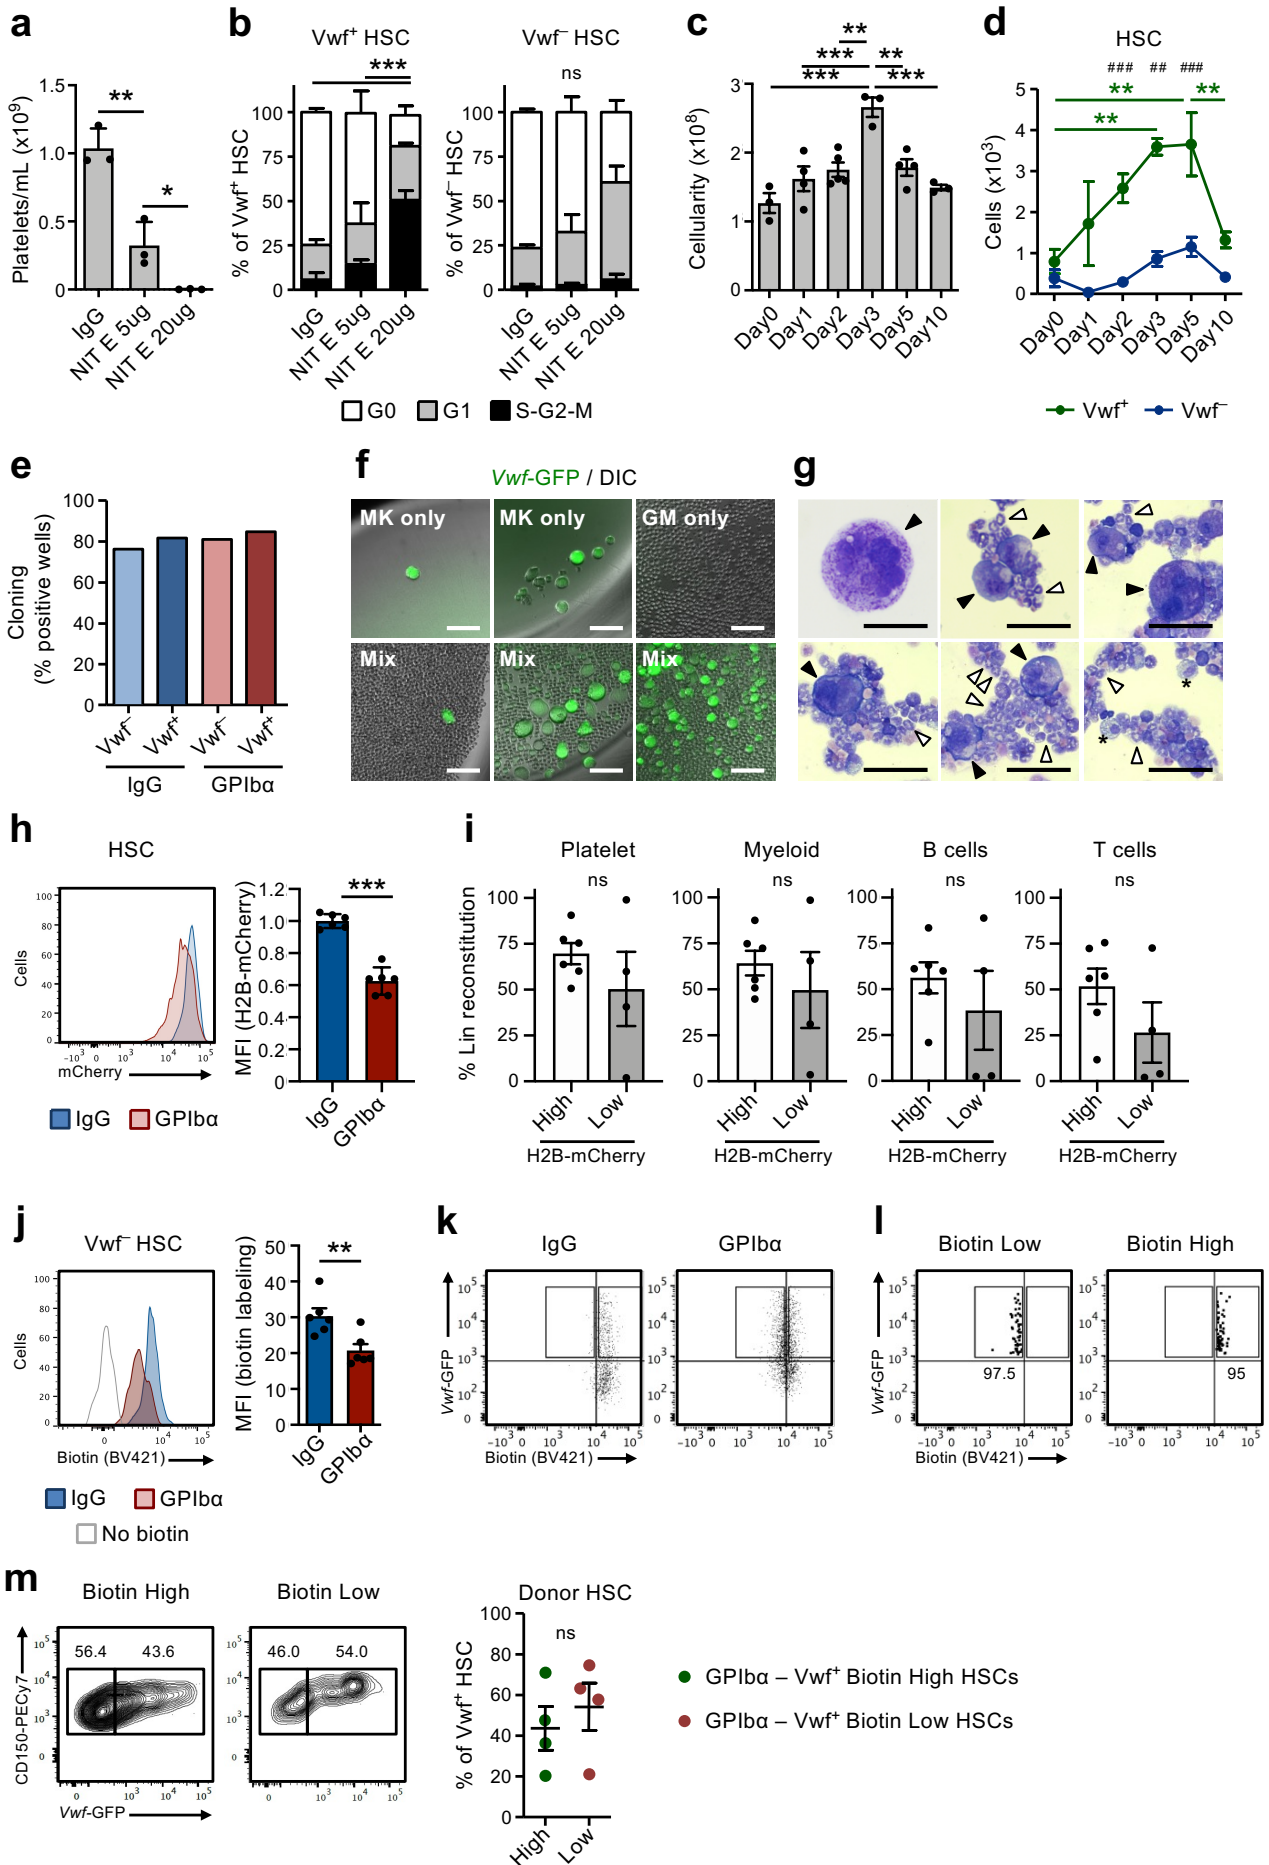

**Supplementary Figure 2. Platelet depletion mobilizes Vwf<sup>+</sup> HSCs and increases their megakaryocyte differentiation efficiency.** (Related to main Figure 1)

**(a-b)** Platelet depletion efficiency **(a)** and cell cycle phase distribution of Vwf<sup>+</sup> (left) and Vwf<sup>-</sup> (right) HSCs **(b)** 1 day post intravenous administration of an alternative monoclonal antibody against GPIIb/IIIa (NitE). Data represent mean  $\pm$ SD of 3 mice per group in 2 independent experiments. Statistics in **(b)** refer to S-G2-M cell cycle stage. \*\*\* $p$ <0.001; \*\* $p$ <0.01; \* $p$ <0.05; ns, non-significant ( $p$ >0.05) assessed using 1-way ANOVA **(a)** or 2-way ANOVA **(b)** with Tukey's multiple comparisons.

**(c-d)** Transient extramedullary hematopoiesis in spleen post platelet depletion (GPIIb/IIIa). Kinetics of spleen cellularity **(c)** and absolute numbers of Vwf<sup>+</sup> and Vwf<sup>-</sup> HSCs in spleen **(d)** at the indicated time points post platelet depletion. In **(c)** data represent mean  $\pm$ SEM of 3 (Day0), 4 (Day1), 5 (Day2), 3 (Day3), 4 (Day5) and 3 (Day10) mice in 4 independent experiments; \*\*\* $p$ <0.001; \*\* $p$ <0.01; \* $p$ <0.05 (1-way ANOVA with Tukey's multiple comparisons). In **(d)** data represent mean  $\pm$ SEM of 2 (Day0), 3 (Day1), 5 (Day2), 3 (Day3), 4 (Day5) and 3 (Day10) mice in 4 independent experiments; \*\*,  $p$ <0.01 for Vwf<sup>+</sup> HSCs; numbers of Vwf<sup>-</sup> HSCs do not significantly change post platelet depletion and Vwf<sup>-</sup> HSC (1-way ANOVA with Tukey's multiple comparisons); ##,  $p$ <0.01 and ###,  $p$ <0.001 for the comparison of Vwf<sup>+</sup> vs. Vwf<sup>-</sup> HSCs (2-way ANOVA with Sidak's multiple comparisons).

**(e-g)** Mk-GM lineage potential analysis of single Vwf<sup>-</sup> and Vwf<sup>+</sup> HSCs isolated from mice 16hrs post administration of IgG or GPIIb/IIIa antibodies. **(e)** Cloning frequency. Data from 138, 364, 147 and 451 single cell-derived colonies analyzed, respectively, from 5 biological replicates in 4 independent experiments. **(f)** Wells containing Mks and or myeloid/GM cells were scored on an inverted microscope. Mk cells were defined as big Vwf-GFP<sup>+</sup> cells. Images depict examples of Mk only, GM only and Mk/GM colonies. Scale bars represent 100 $\mu$ m. **(g)** May-Grunwald-Giemsa staining of cytopsin slides showing cells with typical Mk (black arrow heads), neutrophil (white arrow heads) or monocytic (asterisk) morphology from day 8 cultures. Scale bars represent 50 $\mu$ m.

**(h)** H2B-mCherry dilution analysis of HSCs 3 days post IgG or GPIIb/IIIa treatment. Representative plot (left) and mean  $\pm$ SD MFI (normalized for MFI of IgG control; right) from 6 mice per group in 3 independent experiments. \*\*\*,  $p$ <0.001 (two-sided t-test).

**(i)** Long-term reconstitution (16 weeks) of platelet, myeloid and lymphoid cell lineages in blood by H2B-mCherry High and Low HSC fractions 3 days post platelet depletion. Data represent mean  $\pm$ SEM of 4 and 6 donors of H2B-mCherry Low and High HSCs, respectively, each transplanted into 2 recipients, in 3 independent experiments. Statistical significance was assessed using two-sided t-test.

**(j)** Biotin proliferation analysis of Vwf-GFP<sup>-</sup> HSCs 2 days post IgG or GPIIb/IIIa treatment. Representative plot (left) and mean  $\pm$ SD MFIs (normalized for MFI of No biotin labelling control; right) from 6 mice per group in 3 independent experiments. Statistical significance assessed using two-sided t-test.

**(k-l)** Representative FACS gating strategy **(i)** and sorting purity analysis **(j)** for FACS sorting of Biotin high and Biotin low Vwf<sup>+</sup> HSCs 2 days post GPIIb/IIIa treatment. **(j)** Numbers in plots indicate the average purity from 4 purity tests in 2 independent experiments.

**(m)** Frequency of Vwf<sup>+</sup> HSCs within the donor HSC compartment (Left, representative FACS profiles; Right, combined data) 16 weeks post transplantation of biotin high and biotin low Vwf-GFP<sup>+</sup> HSC fractions, isolated from mice 2 days post platelet depletion. Data represent mean  $\pm$ SEM of 4 donors in 2 independent experiments. Each dot in the graphs represents the mean of 2 recipient mice transplanted per donor. Numbers in FACS plots are averages of all mice analyzed. ns, non-significant ( $p$ >0.05), assessed using two-sided t-test.

# Supplementary Figure 3

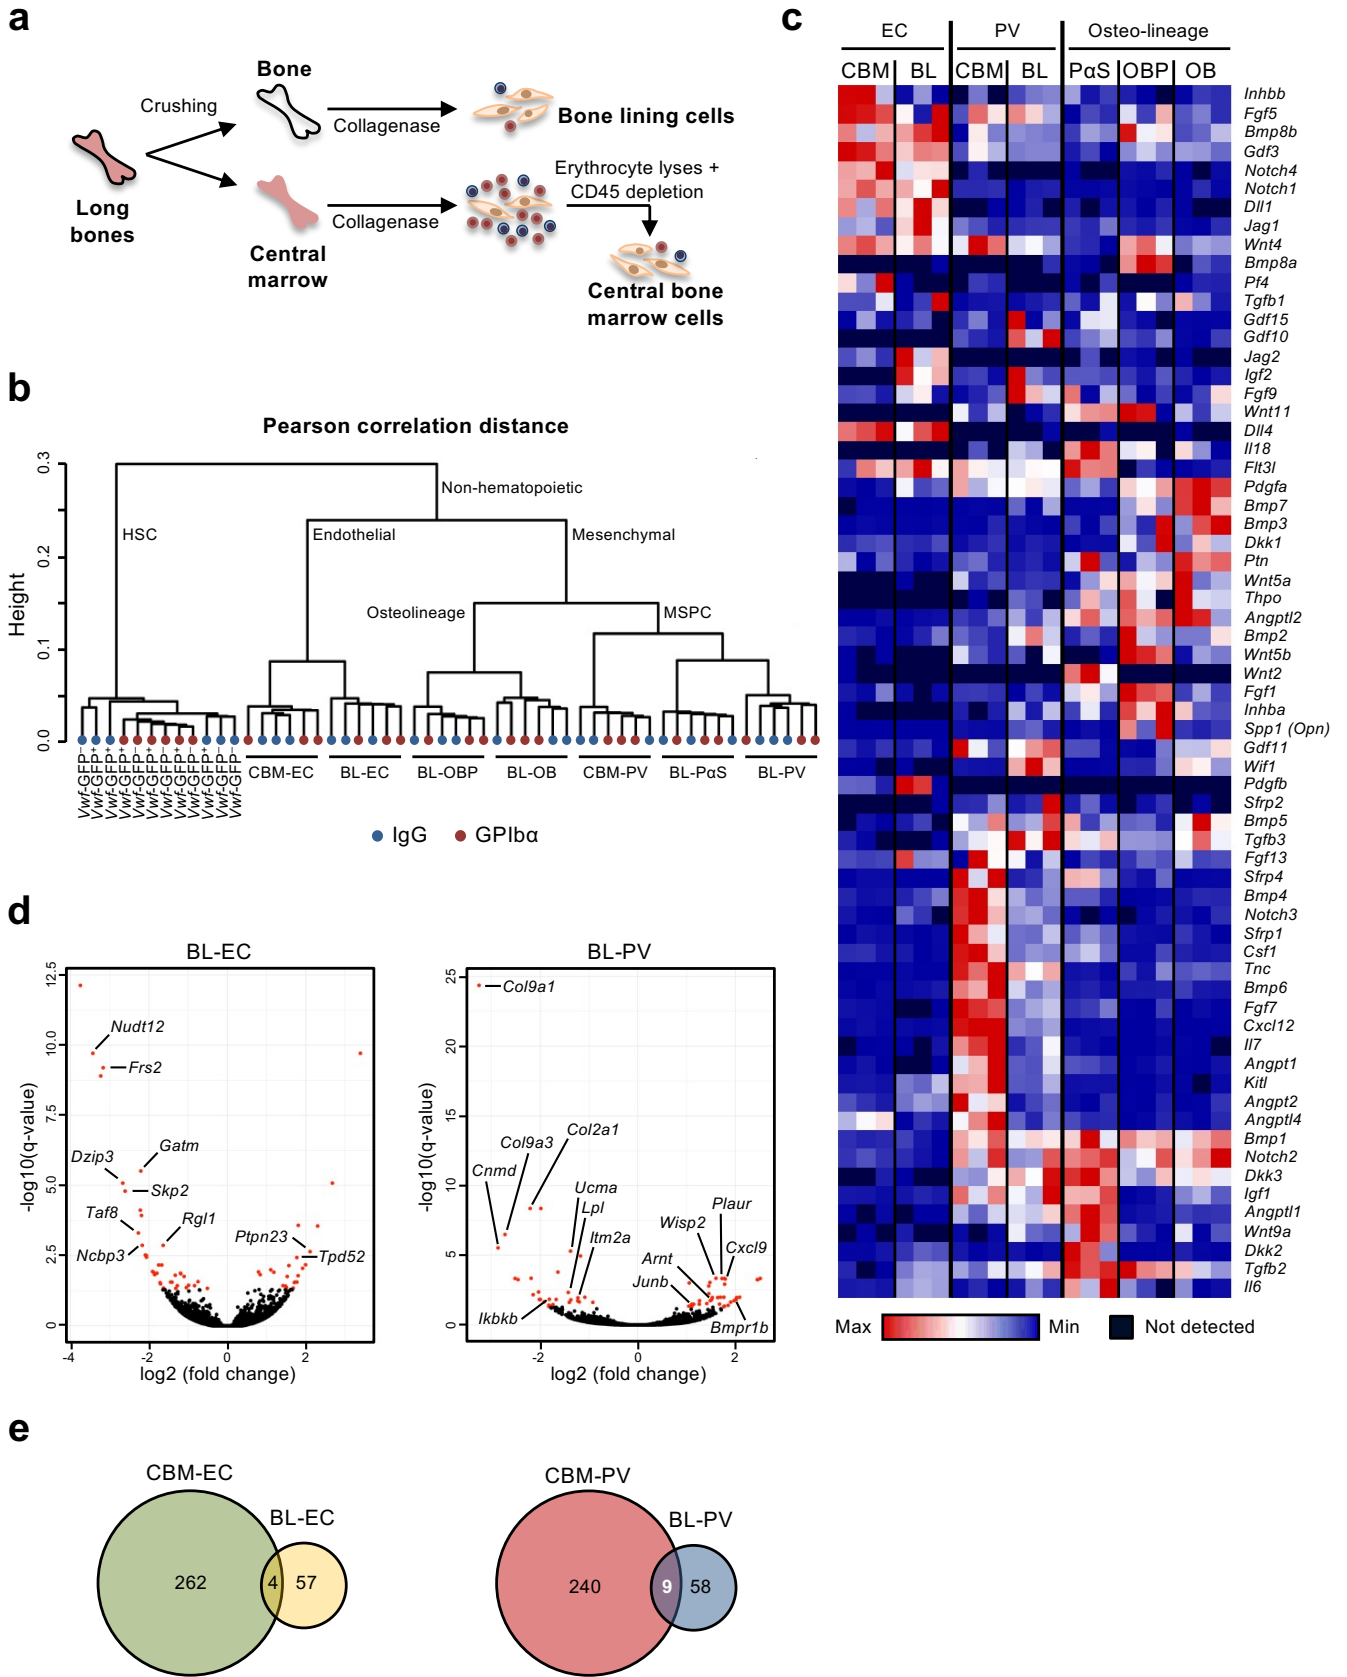

### **Supplementary Figure 3. RNA-sequencing analysis of bone marrow endothelial and stromal cells.**

(Related to main Figure 2)

**(a)** Illustration of procedure for analysis and isolation of niche cells from two different anatomic regions within BM, the bone lining (BL) and central bone marrow (CBM) regions, 1 day post treatment with anti-GPIIb $\alpha$  or isotype (IgG) control antibody.

**(b)** Hierarchical clustering by cell population (one minus Pearson correlation) showing the relationship between the different cell populations analyzed, according to their global gene expression profile. EC, endothelial cells, PV, LepR<sup>+</sup> perivascular cells; OB, osteoblasts; OBP, osteoblast progenitors; P $\alpha$ S, Pdfgr $\alpha$ <sup>+</sup>Sca1<sup>+</sup> mesenchymal progenitors.

**(c)** Expression (FPKM) of different hematopoietic regulators in the different niche cell populations isolated from mice in homeostasis. Hierarchical clustering by gene (one minus Pearson correlation) was used to group genes with similar pattern of expression in the bone marrow niche.

**(d)** Volcano plots of genes differentially expressed in BL-EC and BL-PV cells isolated from mice in homeostasis and after platelet depletion. Red dots indicate significantly differentially expressed genes (adjusted  $p$  value ( $q$ )<0.05).

**(e)** Venn diagram showing number of genes differentially expressed exclusively or overlapping between CBM-EC and BL-EC (left) or CBM-PV and BL-PV (right) cells, isolated from mice in homeostasis or after platelet depletion.

# Supplementary Figure 4

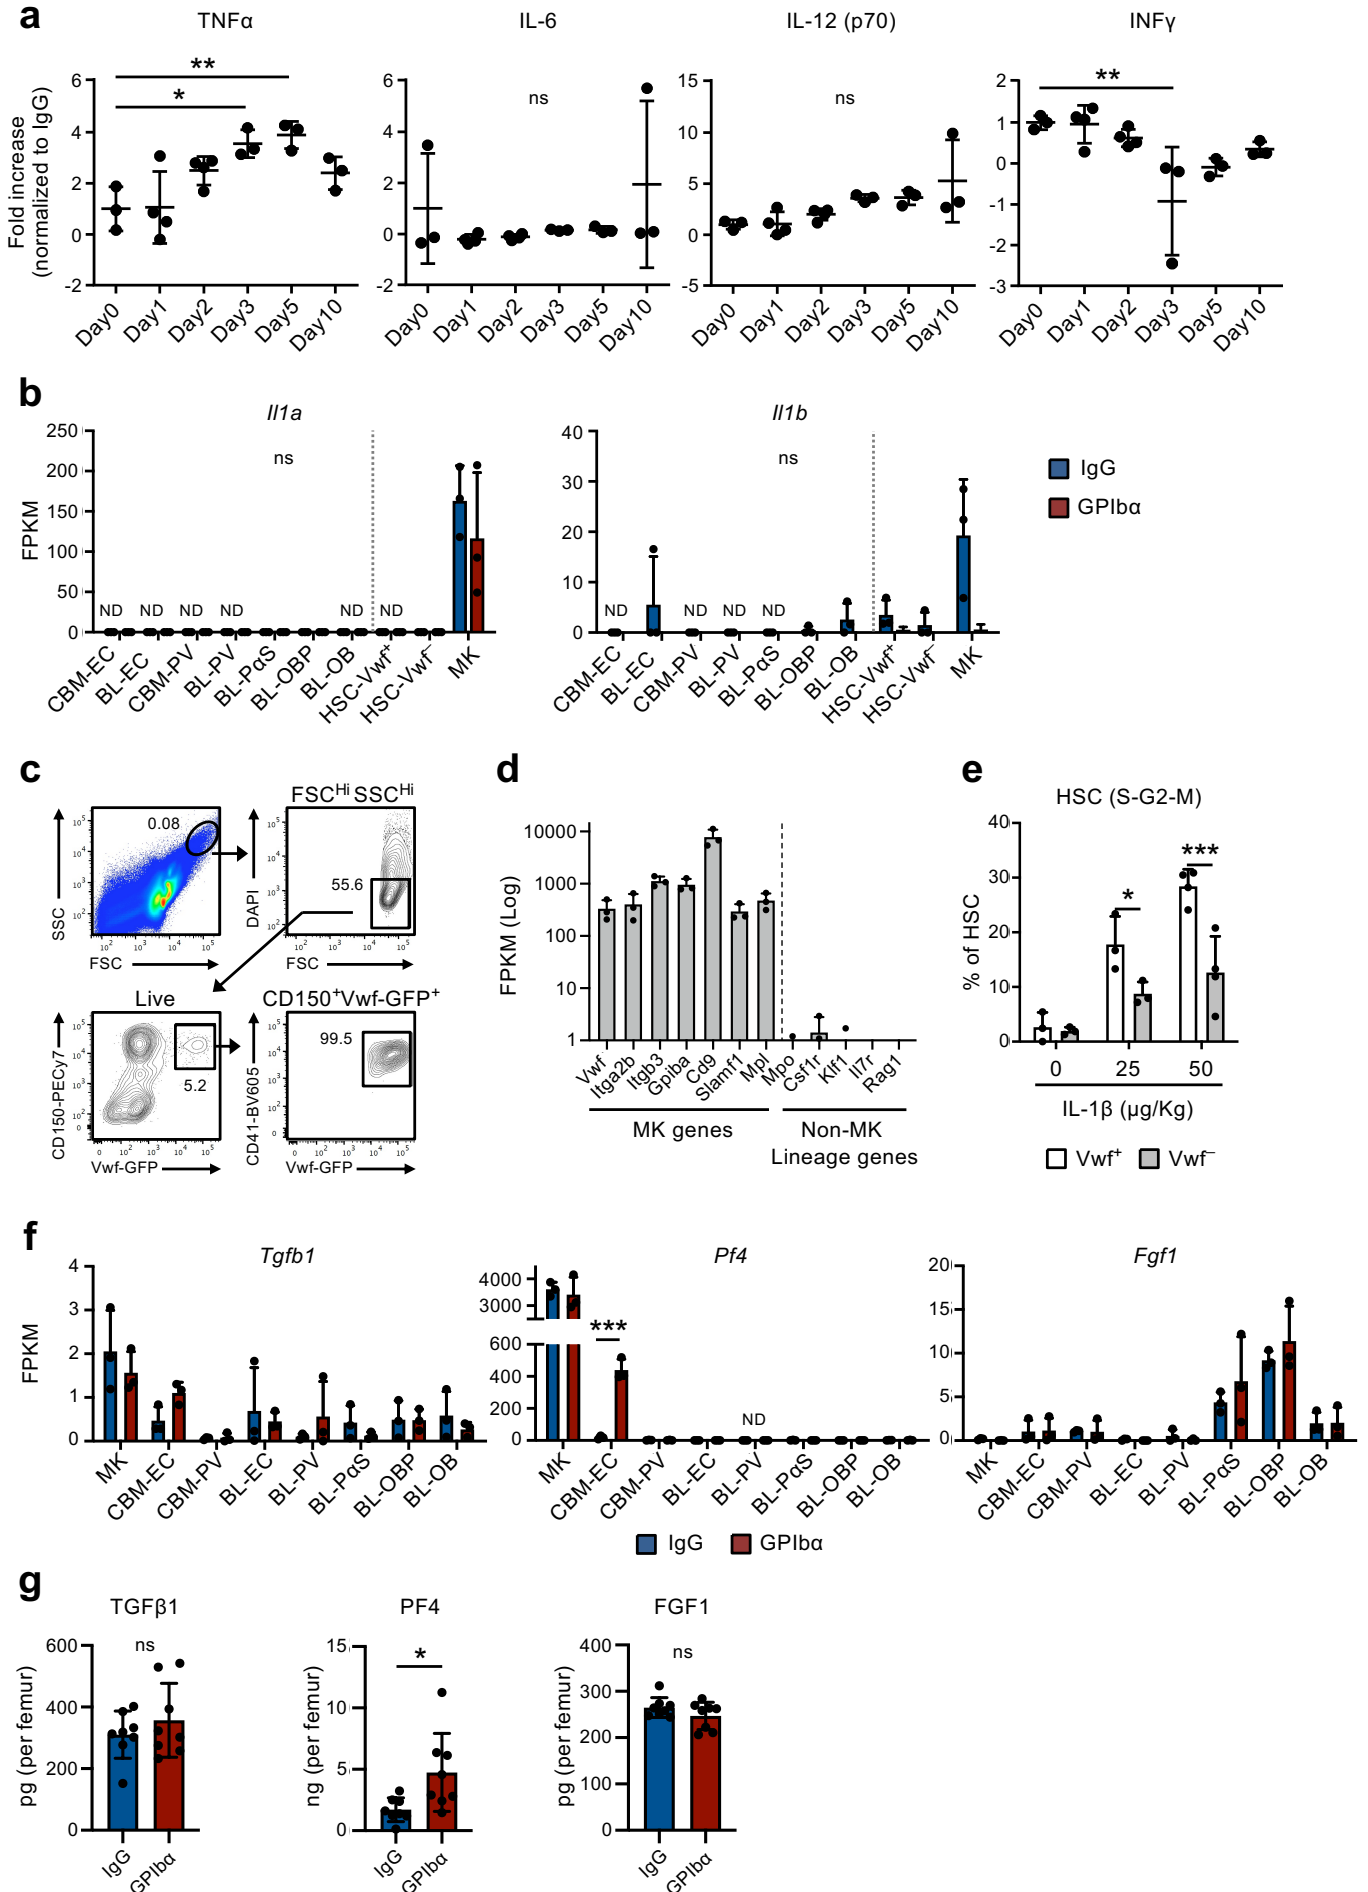

#### **Supplementary Figure 4 - Expression of inflammatory cytokines in bone marrow.**

(Related to main Figure 3)

**(a)** Mean  $\pm$ SD levels (fold-increase relative to Day0) of the indicated cytokines in bone marrow extracellular fluid isolated from mice at the indicated time points post platelet depletion with GPIIb/IIIa antibody. Control mice (Day 0) received isotype (IgG) control antibody. Data from 3 (Day0), 4 (Day1), 4 (Day2), 3 (Day3), 3 (Day5) and 3 (Day10) mice from 4 independent experiments. \*\*\*,  $p < 0.001$ ; \*\*,  $p < 0.01$ ; \*,  $p < 0.05$ ; ns, non-significant ( $p > 0.05$ ); (1-way ANOVA with Dunnett's multiple comparisons).

**(b)** RNA-sequencing analysis of *Il1a* (left) and *Il1b* (right) genes expression (FPKM) in different niche cells, HSCs and Mks, isolated from the bone marrow of mice in homeostasis (IgG treated) or 1 day post platelet depletion (GPIIb/IIIa treated). Data represent mean  $\pm$ SD of 3 mice analyzed per condition. ND, not detected. ns, non-significant ( $p > 0.05$ ) between IgG and GPIIb/IIIa, assessed with two-sided t-test.

**(c)** FACS analysis and gating strategy for sorting of bone marrow Mks. Mks were sorted as FSC<sup>Hi</sup>SSC<sup>Hi</sup>DAPI-CD150<sup>+</sup>Vwf-GFP<sup>+</sup>CD41<sup>+</sup> cells. Numbers (represent percentage of parental gates

**(d)** Expression (FPKM) of Mk-associated genes and of non-Mk lineage-associated genes in the sorted cells. Data represent mean  $\pm$ SD from 3 mice in 3 independent experiments.

**(e)** Cell cycle analysis of Vwf<sup>+</sup> and Vwf<sup>-</sup>HSCs from mice 1 day post intravenous administration of the indicated doses of IL-1 $\beta$ . Data are mean  $\pm$ SD of 3 mice receiving 0 or 25  $\mu$ g/Kg, and 4 mice receiving 50 $\mu$ g/Kg IL-1 $\beta$ , in 2 independent experiments. \*\*\*,  $p < 0.001$ ; \*,  $p < 0.05$ ; 2-way ANOVA with Sidak's multiple comparisons).

**(f)** RNA-sequencing expression analysis of indicated niche-derived HSC regulators in niche cells, isolated from the bone marrow of mice in homeostasis (IgG treated) or 1 day post platelet depletion (GPIIb/IIIa treated). Data represent mean  $\pm$ SD of 3 mice analyzed per condition. \*\*\*,  $p < 0.001$  (two-sided t-Test); ND, not detected.

**(g)** Mean  $\pm$ SD levels of the indicated soluble regulators in bone marrow extracellular fluid isolated from mice in homeostasis (IgG treated) or 1 day post platelet depletion (GPIIb/IIIa treated). Data from 8 mice per condition. \*\*\*,  $p < 0.001$ ; \*,  $p < 0.05$ ; ns, non-significant,  $p > 0.05$ ; (two-sided t-Test).



# Supplementary Figure 5

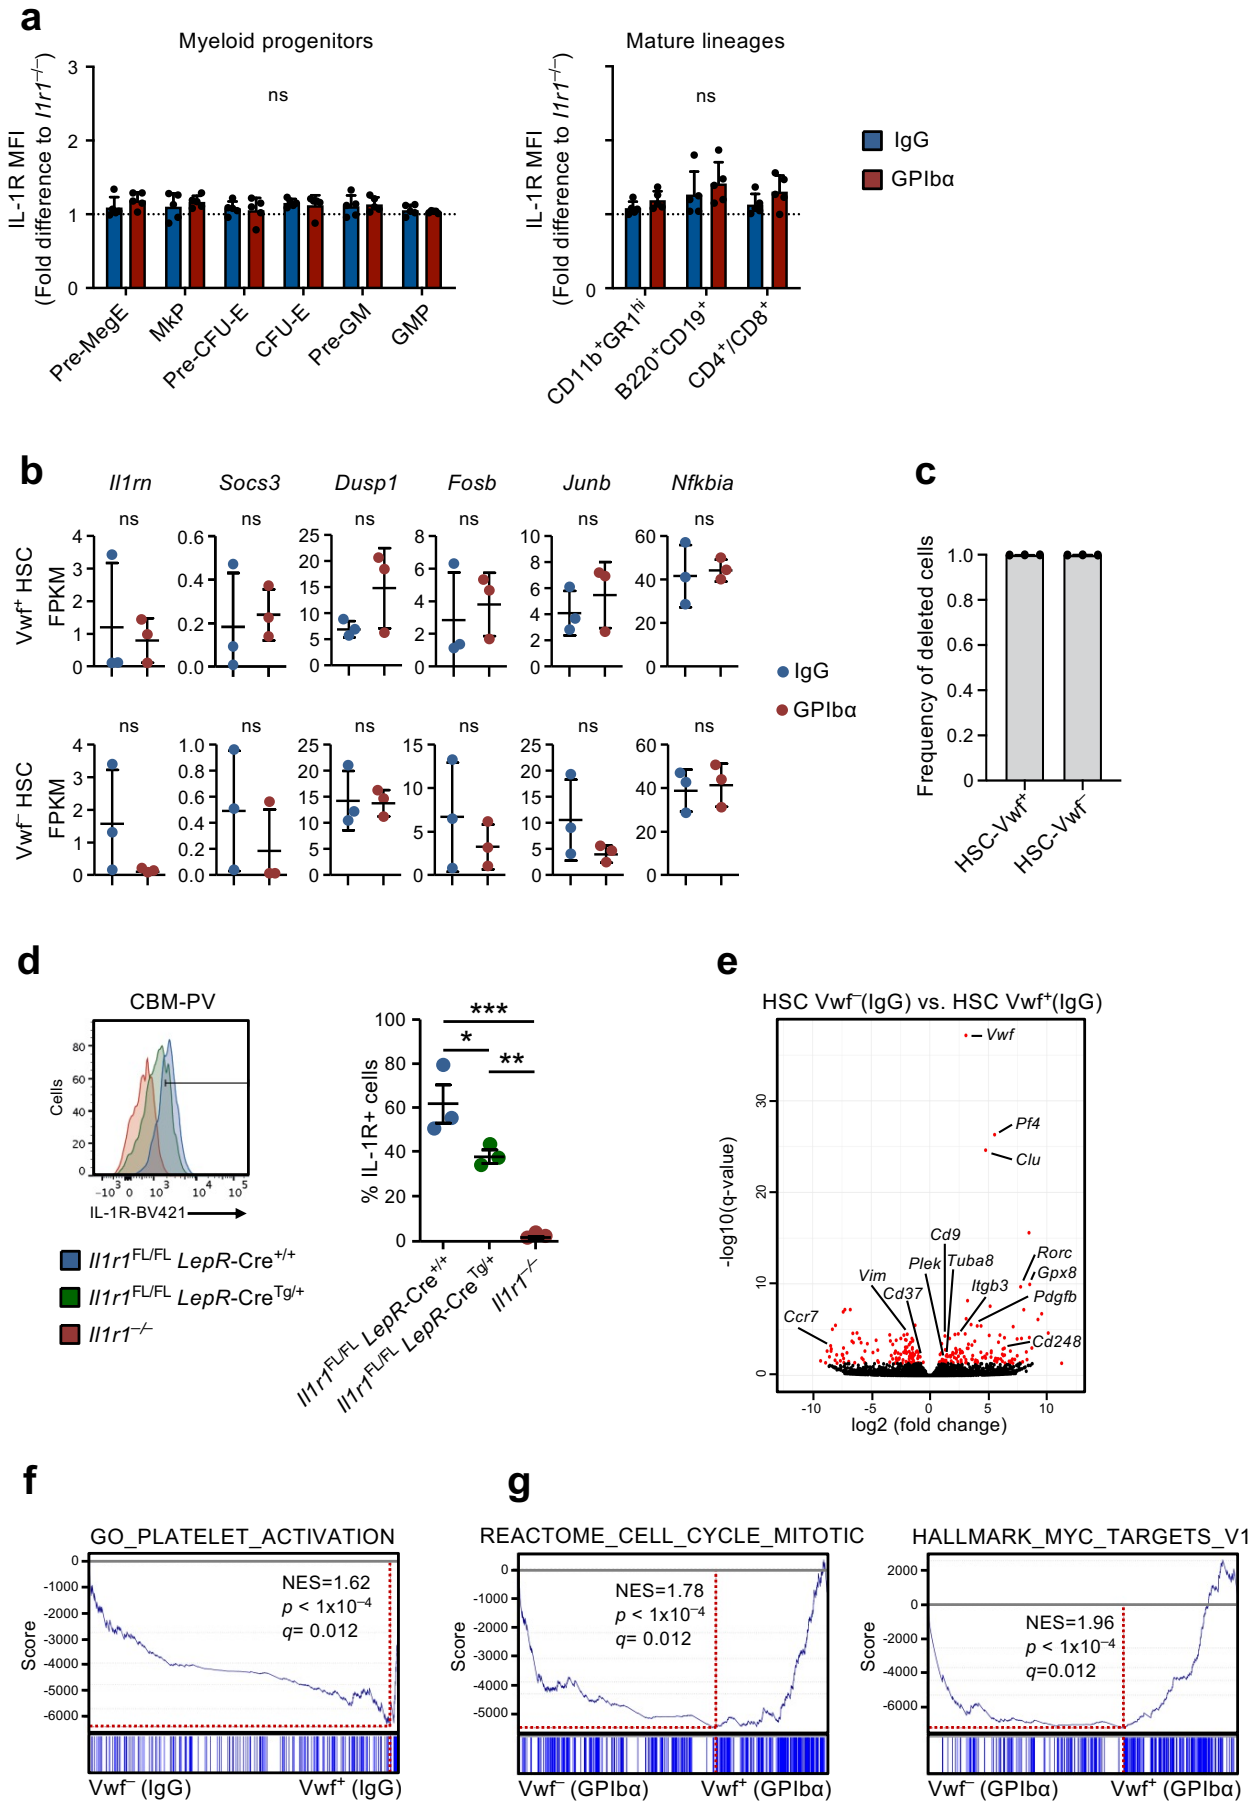

### Supplementary Figure 5. RNA-sequencing analysis of Vwf<sup>+</sup> and Vwf<sup>-</sup> HSCs after platelet depletion

(Related to main Figures 4 and 5).

**(a)** Flow cytometric analysis of IL-1R expression in different hematopoietic progenitors and mature hematopoietic cells in the bone marrow of mice in homeostasis or 1 day post platelet depletion. Data represent the mean  $\pm$ SD of MFI of each cell population, normalized for the MFI of the equivalent population in *Il1r1*<sup>-/-</sup> mice analyzed within the same experiments. Data are from 5 mice per condition in 2 independent experiments. ns, non-significant ( $p > 0.05$ ) between IgG and GPIb $\alpha$ , assessed with two-sided t-test.

**(b)** Expression of IL-1 signaling pathway affiliated genes in Vwf<sup>+</sup> and Vwf<sup>-</sup> HSCs isolated from mice in homeostasis or 1 day post platelet depletion. Mean  $\pm$ SD FPKM data of 3 biological replicates per condition. ns, non-significant ( $p > 0.05$ ) between IgG and GPIb $\alpha$ , assessed with two-sided t-test.

**(c)** Analysis of Vav-Cre-mediated deletion efficiency in HSCs of *Il1r1*<sup>FL/FL</sup> at genomic DNA level by ddPCR. Data represent frequency of deleted Vwf<sup>+</sup> or Vwf<sup>-</sup> HSCs isolated from *Il1r1*<sup>FL/FL</sup>Vav-Cre<sup>Tg/+</sup> mice. Data from 3 mice, 3 FACS-sorted technical replicates from each mouse, each run as 2 ddPCR technical replicates.

**(d)** *Lepr*-Cre mediated deletion of the *Il1r1*<sup>FL</sup> locus in LepR<sup>+</sup> CBM-PV cells. Representative FACS analysis (left) and frequency of IL-1R<sup>+</sup> cells in mice with the indicated genotypes. Data from 3 mice per genotype in 2 independent experiments. \*\*\*,  $p < 0.001$ ; \*\*,  $p < 0.01$ ; \*,  $p < 0.05$ ; 1-way ANOVA with Tukey's multiple comparisons).

**(e)** Volcano plot of Differentially expressed genes between Vwf<sup>+</sup> and Vwf<sup>-</sup> HSCs in homeostasis (IgG) showing the Mk lineage priming of Vwf<sup>+</sup> HSCs at molecular level. Red dots indicate significantly differentially expressed genes (adjusted  $p$  value ( $q$ )  $< 0.05$ ).

**(f)** Gene set enrichment analysis of the indicated platelet/Mk associated gene set.

**(g)** Gene set enrichment analysis of the indicated cell cycle associated gene sets comparing Vwf<sup>-</sup> and Vwf<sup>+</sup> HSCs from GPIb $\alpha$  treated mice. NES, normalized enrichment score (or scaled score).

## Supplementary Figure 6

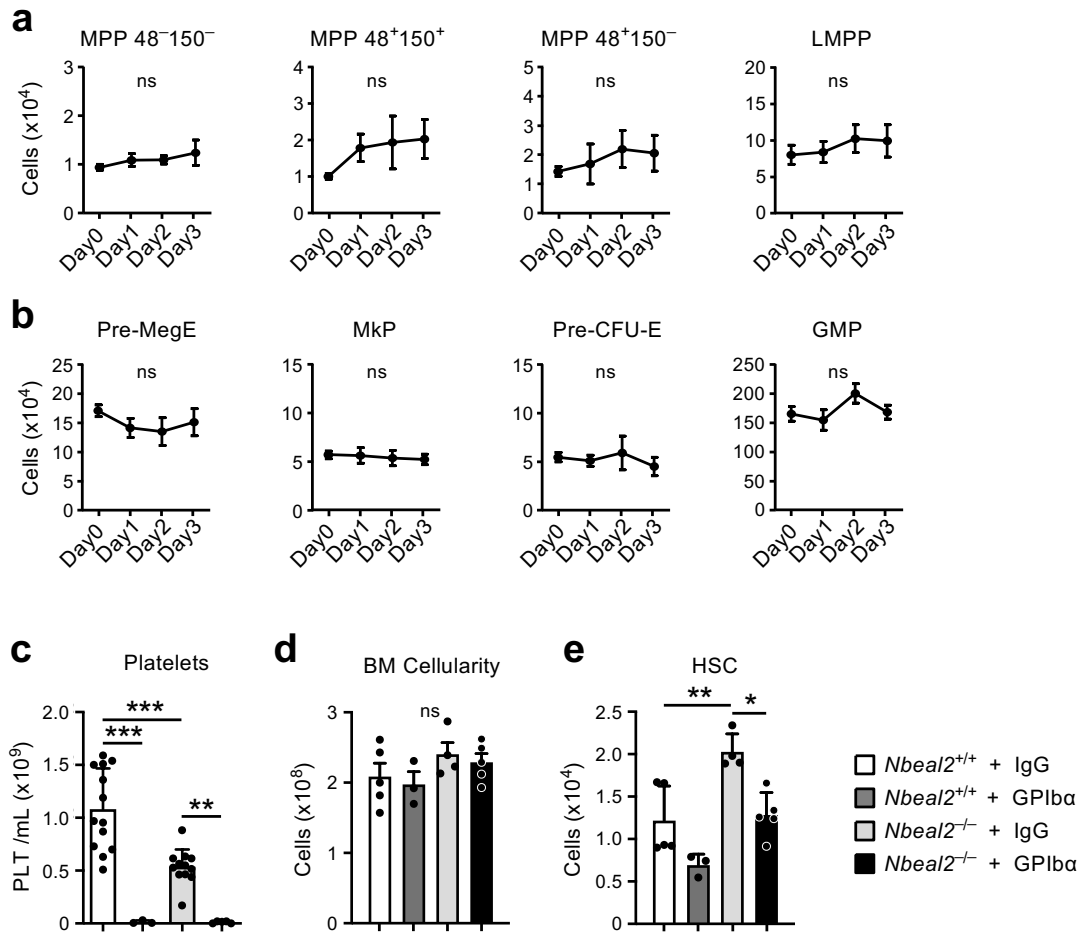

### Supplementary Figure 6. Platelet activation is critical for the activation of Vwf<sup>+</sup> HSCs in response to platelet depletion (Related to main Figure 6).

**(a-b)** Number of multipotent progenitors **(a)** and myeloid progenitors **(b)** at the indicated time points post platelet depletion with NEU. Data represent mean  $\pm$ SEM of 5 (Day0), 4 (Day1), 5 (Day2) and 6 (Day3) mice from 4 independent experiments. No significant differences were observed for the absolute numbers of any cell population at the different time points.

**(c-e)** Peripheral blood platelet counts **(c)**, bone marrow cellularity **(d)** and absolute bone marrow HSC numbers **(e)** in *Nbeal2*<sup>-/-</sup> mice and littermate *Nbeal2*<sup>+/+</sup> controls in homeostasis and after platelet depletion with GPIbα antibody. **(c)** Data represent mean  $\pm$ SD of 13 (Wt-IgG), 3 (Wt-GPIbα), 12 (*Nbeal2*<sup>-/-</sup>-IgG) and 5 (*Nbeal2*<sup>-/-</sup>-GPIbα) mice from 4 independent experiments. **(d-e)** Data represent mean  $\pm$ SD of 5 (Wt-IgG), 3 (Wt-GPIbα), 4 (*Nbeal2*<sup>-/-</sup>-IgG) and 5 (*Nbeal2*<sup>-/-</sup>-GPIbα) mice from 3 independent experiments. For all panels, \*\*\**p*<0.001; \*\**p*<0.01; \**p*<0.05; ns, non-significant (*p*>0.05), (1-way ANOVA with Tukey's multiple comparisons).

## Supplementary Table 1

| Antibody           | Clone        | Dilution | Supplier         | Catalog #  | Staining                                            |
|--------------------|--------------|----------|------------------|------------|-----------------------------------------------------|
| Alcam-Bio          | AAC06342     | 1/100    | R&D Systems      | FAB1172P   | Niche cells                                         |
| B220-PECF594       | RA3-6B2      | 1/200    | BD Biosciences   | 562313     | Peripheral blood                                    |
| B220-PECy5         | RA3-6B2      | 1/400    | BioLegend        | 103210     | Lineage (HSPC, Myeloid progenitors)                 |
| B220-BUV395        | RA3-6B2      | 1/200    | BD Biosciences   | 563793     | Lineage (HSPC)                                      |
| CD105-Bio          | MJ7/18       | 1/800    | BioLegend        | 120404     | Myeloid progenitors                                 |
| CD105-BV421        | MJ7/18       | 1/100    | BD Biosciences   | 562760     | Myeloid progenitors                                 |
| CD11b/Mac1-AF700   | M1/70        | 1/800    | eBiosciences     | 56-0112-82 | Mature cells                                        |
| CD11b/Mac1-APC     | M1/70        | 1/600    | BioLegend        | 101212     | Peripheral blood                                    |
| CD140a/Pdfgra-APC  | APA5         | 1/40     | ebiosciences     | 17-1401-81 | Niche cells                                         |
| CD150-APC          | TC15-12F12.2 | 1/100    | BioLegend        | 115910     | Myeloid progenitors, Peripheral blood               |
| CD150-PECy7        | TC15-12F12.2 | 1/400    | BioLegend        | 115914     | HSPC, HSC cell cycle, Platelets                     |
| CD150-BV785        | TC15-12F12.2 | 1/200    | BioLegend        | 115937     | HSPC                                                |
| CD16/32 (FcγR)-APC | 93           | 1/600    | eBiosciences     | 17-0161-81 | Myeloid progenitors                                 |
| CD16/32 (FcγR)-PE  | 93           | 1/400    | eBiosciences     | 12-0161-81 | Myeloid progenitors                                 |
| CD19-PECy7         | 1D3          | 1/500    | eBiosciences     | 25-0193-82 | Mature cells in BM, Peripheral blood                |
| CD31-PECy7         | 390          | 1/1600   | eBiosciences     | 25-0311-82 | Niche cells                                         |
| CD41-APC           | MWRReg30     | 1/200    | BioLegend        | 133914     | Platelets                                           |
| CD41-BV605         | MWRReg30     | 1/50     | BioLegend        | 133921     | Myeloid progenitors                                 |
| CD41-PE            | MWRReg30     | 1/200    | eBiosciences     | 12-0411-83 | Peripheral blood                                    |
| CD41-PECy7         | MWRReg30     | 1/800    | eBiosciences     | 25-0411-82 | Myeloid progenitors, Platelets                      |
| CD42b/GPIIb-PE     | Xia.G5       | 1/2.5    | Emfret analytics | M040-2     | HSPC, Myeloid progenitors                           |
| CD45.1-BV650       | A20          | 1/25     | BioLegend        | 110736     | HSPC                                                |
| CD45.1-PE          | A20          | 1/100    | eBiosciences     | 12-0453-83 | Myeloid progenitors, Peripheral blood               |
| CD45.2-AF700       | 104          | 1/100    | BioLegend        | 109822     | HSPC, Myeloid progenitors, Peripheral blood         |
| CD45-AF700         | 30-F11       | 1/50     | eBiosciences     | 56-0451-82 | Niche cells                                         |
| CD48-APC           | HM48-1       | 1/600    | BioLegend        | 103412     | HSPC, HSC cell cycle                                |
| CD4-APCeF780       | RM4-5        | 1/1200   | eBiosciences     | 47-0042-82 | Peripheral blood                                    |
| CD4-PECy5          | RM4-5        | 1/400    | BioLegend        | 100514     | Lineage (HSPC, Myeloid progenitors)                 |
| CD4-BUV395         | RM4-5        | 1/400    | BD Biosciences   | 740208     | HSPC                                                |
| CD5-PECy5          | 53-7.3       | 1/800    | BioLegend        | 100610     | Lineage (HSPC, Myeloid progenitors)                 |
| CD5-BUV395         | 53-7.3       | 1/100    | BD Biosciences   | 740206     | HSPC                                                |
| CD62P-PE           | Psel.KO2.3   | 1/100    | eBiosciences     | 12-0626-80 | Platelets                                           |
| CD8-APCeF780       | 53-6.7       | 1/400    | eBiosciences     | 47-0081-82 | Peripheral blood                                    |
| CD8a-PECy5         | 53-6.7       | 1/1200   | BioLegend        | 100710     | Lineage (HSPC, Myeloid progenitors)                 |
| CD8a-BUV395        | 53-6.7       | 1/200    | BD Biosciences   | 563786     | HSPC                                                |
| cKit-APC-eF780     | 2B8          | 1/1200   | eBiosciences     | 47-1171-82 | HSPC, Myeloid progenitors, HSC cell cycle           |
| Fit3-PE            | A2F10        | 1/50     | BioLegend        | 135306     | HSPC staining                                       |
| GR1-PECy5          | RB6-8C5      | 1/800    | BioLegend        | 108410     | Lineage (HSC, Myeloid progenitors)                  |
| GR1-PO             | RB6-8C5      | 1/100    | Invitrogen       | RM3030     | Peripheral blood                                    |
| GR1-BUV395         | RB6-8C5      | 1/400    | BD Biosciences   | 563849     | HSPC                                                |
| IL-1b-PE           | 166931       | 1/10     | R&D Systems      | IC4013P    | Platelets                                           |
| IL-1R-BV421        | 35F5         | 1/30     | BD Biosciences   | 564387     | Niche cells, HSPC, myloid progenitors, mature cells |
| Ki67-FITC          | B56          | 1/50     | BD Biosciences   | 556026     | HSC cell cycle                                      |
| Ki67-PE            | B56          | 1/50     | BD Biosciences   | 556027     | HSC cell cycle                                      |
| LepR-Bio           | Polyclonal   | 1/100    | R&D Systems      | BAF497     | Niche cells                                         |
| NK1.1-PB           | PK136        | 1/1200   | BioLegend        | 108722     | Peripheral blood                                    |
| Rat IgG1k-BV421    | R3-34        | 1/30     | BD Biosciences   | 562868     | Control for IL-1R Ab                                |
| Rat IgG2b-PE       | 141945       | 1/10     | R&D Systems      | IC013P     | Control for IL1β Ab                                 |
| Rat IgG-PE         | Polyclonal   | 1/2.5    | Emfret analytics | P-190-2    | Control for CD42b Ab                                |
| SAV-BV421          | -            | 1/200    | BioLegend        | 405226     | HSC-Biotin proliferation                            |
| SAV-PE             | -            | 1/2000   | BD Biosciences   | 12-4317-87 | Niche cells                                         |
| SAV-PETxR          | -            | 1/800    | BD Biosciences   | 551487     | Myeloid progenitors                                 |
| Sca1-BV605         | D7           | 1/150    | BioLegend        | 405229     | HSPC and Myeloid progenitors                        |
| Sca1-FITC          | E13-161.7    | 1/200    | BioLegend        | 122506     | HSC cell cycle                                      |
| Sca1-PerCP-Cy5.5   | D7           | 1/300    | eBiosciences     | 45-5981-80 | HSC cell cycle                                      |
| Sca1-PECy7         | E13-161.7    | 1/400    | BioLegend        | 122514     | HSPC                                                |
| Ter119-PECy5       | TER-119      | 1600     | BioLegend        | 116210     | Lineage (HSPC), Niche cells, Peripheral blood       |
| Ter119-BUV395      | TER-119      | 1/100    | BD Biosciences   | 563827     | HSPC                                                |

Supplementary Table 1 – Flow Cytometry antibodies and application
