# Supplementary material for: Perivascular niche cells sense thrombocytopenia and activate hematopoietic stem cells in an IL-1 dependent manner
Source: PubMed Central journal article supplement (PMC10539537; doi:10.1038/s41467-023-41691-y), 2023-09-28
Supplement: 41467_2023_41691_MOESM3_ESM.pdf [file 41467_2023_41691_MOESM3_ESM.pdf]

## **Description of Additional Supplementary Files document**

**Supplementary Data 1** - Expression of known genes characterizing different niche cell populations and hematopoietic regulators

**Supplementary Data 2** - Differentially expressed genes between IgG and GPIba CBM-EC and BL-EC cells

**Supplementary Data 3** - Differentially expressed genes between IgG and GPIba CBM-PV and BL-PV cells

**Supplementary Data 4** - Differentially expressed genes between IgG and GPIba BL-P $\alpha$ S, BLOBP and BL-OB cells

**Supplementary Data 5** - Gene ontology analysis on genes differentially expressed in CBM-PV and CBM-EC

**Supplementary Data 6** - Differentially expressed genes between IgG and GPIba Vwf+ HSCs

**Supplementary Data 7** - Differentially expressed genes between IgG and GPIba Vwf- HSCs

**Supplementary Data 8** - Gene ontology analysis on genes differentially expressed only in VWF+ HSCs
